# Supplementary material
Source: publisher site journal article supplement (https://www.degruyterbrill.com/publication/isbn/9783110272567/downloadAsset/9783110272567_Inhaltsvereichnis.pdf)
Supplement: Supplementary file 1 [file 9783110272567_Inhaltsvereichnis.pdf]

## Inhaltsverzeichnis

| Nr. |                                                                                                                                                                                             | Seite |
|-----|---------------------------------------------------------------------------------------------------------------------------------------------------------------------------------------------|-------|
| 1   | Straßensondernutzungsgebühr für Veranstaltung von Scientology. VGH Baden-Württemberg, Urteil vom 16.1.2008 (5 S 393/06) . . . . .                                                           | 1     |
| 2   | Arbeitsvertragliche Verweisung auf Zuwendungstarifvertrag des öffentlichen Dienstes. LAG Hamm, Urteil vom 24.1.2008 (8 Sa 1641/07) . . . .                                                  | 12    |
| 3   | Nachrichtendienstliche Beobachtung von Scientology. OVG Nordrhein-Westfalen, Urteil vom 12.2.2008 (5 A 130/05) . . . . .                                                                    | 16    |
| 4   | Grundbuchlicher Eigentumsübergang bei Neuordnung einer Religionsgemeinschaft als Körperschaft d. öffentl. Rechts. LG Paderborn, Beschluss vom 14.2.2008 (5 T 1/08) . . . . .                | 33    |
| 5   | Beseitigung eines im allgemeinen Wohngebiet errichteten Kreuzes. VG Düsseldorf, Urteil vom 14.2.2008 (9 K 4675/06) . . . . .                                                                | 36    |
| 6   | Religiöser Eid und andere Beteuerungsformeln. EGMR, Urteil vom 21.2.2008 (No. 19516/06 -Alexandridis ./, Griechenland-) . . . . .                                                           | 47    |
| 7   | Anspruch eines Kirchengemeindeverbandes auf Umweltinformationen. BVerwG, Urteil vom 21.2.2008 (4 C 13/07) . . . . .                                                                         | 56    |
| 8   | Betreuung in außergerichtlicher Schuldenbereinigung durch Beratungsstelle in christlicher Trägerschaft. AG Rheinberg, Beschluss vom 22.2.2008 (22 II 1410/07 BerH, 22 II 1410/07) . . . . . | 63    |
| 9   | Kopftuchverbot für Lehrerin im öffentl. Schuldienst. VG Gelsenkirchen, Urteil vom 27.2.2008 (1 K 1466/07) . . . . .                                                                         | 65    |
| 10  | Nachbarklage gegen die Errichtung einer Moschee. VG Düsseldorf, Urteil vom 28.2.2008 (4 K 945/07) . . . . .                                                                                 | 76    |
| 11  | Kopftuchverbot bei Identitätsprüfung in einem Konsulat. EGMR, Urteil vom 4.3.2008 (No. 15585/06 -El Morsli ./, Frankreich-) . . . . .                                                       | 83    |
| 12  | Kopftuchverbot für muslimische Krankenschwester an einem katholischen Krankenhaus. ArbG Köln, Urteil vom 6.3.2008 (19 Ca 7222/07) . .                                                       | 87    |
| 13  | Doppelstellung als Arbeitnehmer und Kirchenbeamter. LAG Rheinland-Pfalz, Urteil vom 6.3.2008 (2 Sa 647/07) . . . . .                                                                        | 91    |
| 14  | Kopftuchverbot für Lehrerin im öff. Schuldienst. VGH Baden-Württemberg, Urteil vom 14.3.2008 (4 S 516/07) . . . . .                                                                         | 100   |
| 15  | Urheberrechtsschutz bei Umgestaltungen eines Kircheninnenraumes. BGH, Urteil vom 19.3.2008 (I ZR 166/05) . . . . .                                                                          | 119   |

|    |                                                                                                                                                                |     |
|----|----------------------------------------------------------------------------------------------------------------------------------------------------------------|-----|
| 16 | Zwangsweise Durchsetzung der Schulbesuchspflicht. VG Gelsenkirchen, Beschluss vom 19.3.2008 (4 K 1674/06) .....                                                | 129 |
| 17 | Umsatzsteuerangabe beim Verkauf liturgischer Ware. OLG Karlsruhe, Urteil vom 27.3.2008 (4 U 74/07) .....                                                       | 138 |
| 18 | Ladenschluss an Sonn- u. Feiertagen. Verfassungsgerichtshof des Landes Berlin, Beschluss vom 1.4.2008 (120/07) .....                                           | 141 |
| 19 | Humanistische Grundschule einer Weltanschauungsgemeinschaft. Bayerischer VGH, Urteil vom 3.4.2008 (7 B 07.1292) .....                                          | 149 |
| 20 | Kritische Äußerungen eines kirchlichen Sektenbeauftragten. BayVGH, Urteil vom 4.4.2008 (7 B 06.1179) .....                                                     | 154 |
| 21 | Aufnahme andersgläubiger Schüler in eine Bekenntnisschule. VG Düsseldorf, Urteil vom 8.4.2008 (18 K 131/08) .....                                              | 160 |
| 22 | Gebühr für die kirchenaufsichtl. Genehmigung eines Grundstückskaufvertrags. BVerwG, Urteil vom 10.4.2008 (7 C 47/07) .....                                     | 162 |
| 23 | Umgehung des Kopftuchverbots durch Tragen einer Baskenmütze. LAG Düsseldorf, Urteil vom 10.4.2008 (5 Sa 1836/07) .....                                         | 168 |
| 24 | Anrechnung von kirchl. Vordienstzeiten. OVG Nordrhein-Westfalen Urteil vom 16.4.2008 (6 A 1702/05) .....                                                       | 180 |
| 25 | Kirchensteuerverkürzung als Steuerhinterziehung. BGH, Beschluss vom 17.4.2008 (5 StR 547/07) .....                                                             | 187 |
| 26 | Schadenersatz wegen amtskirchl. Äußerungen über Sekte im Internet. OLG München, Urteil vom 17.4.2008 (1 U 5608/06) .....                                       | 190 |
| 27 | Zwangsweise Durchsetzung der Schulbesuchspflicht. VG Augsburg, Beschluss vom 17.4.2008 (Au 3 S 08.344) .....                                                   | 204 |
| 28 | Betriebsbedingte Kündigung des einzigen Mitglieds einer kirchl. Mitarbeitervertretung. ArbG Krefeld, Urteil vom 17.4.2008 (1 Ca 528/08) ..                     | 215 |
| 29 | Gebührenfreiheit für Verband des Diakonischen Werks. VG Karlsruhe, Urteil vom 18.4.2008 (4 K 268/06) .....                                                     | 218 |
| 30 | Einstufung als gewerbliche oder nichtgewerbliche Nutzung unter Berücksichtigung der Religionsfreiheit. VG Augsburg, Urteil vom 23.4.2008 (Au 6 K 07.358) ..... | 226 |
| 31 | Verletzung des religiösen Empfindens durch eine Getränkemarke „Pontifex“. BPatG, Beschluss vom 23.4.2008 (26 W [pat] 117/06) ....                              | 235 |
| 32 | Einbeziehung kirchlicher Arbeitsrechtsregelung in den Arbeitsvertrag. Hess.LAG, Urteil vom 24.4.2008 (20/11 Sa 207/07) .....                                   | 238 |

|    |                                                                                                                                                                          |     |
|----|--------------------------------------------------------------------------------------------------------------------------------------------------------------------------|-----|
| 33 | Höhergruppierung bei Übertragung der Aufgabe eines pädagogischen Referenten im diözesanen Dienst. LAG Rheinland-Pfalz, Urteil vom 24.4.2008 (2 Sa 663/0) .....           | 245 |
| 34 | Gebührenpflichtigkeit des Verfahrens zur Abgabe einer Kirchenaustrittserklärung in Bayern. BayVerfGH, Entscheidung vom 8.5.2008 (Vf. 7-VII-07) .....                     | 250 |
| 35 | Befreiung vom Schwimmunterricht. VG Düsseldorf, Urteil vom 7.5.2008 (18 K 301/08) .....                                                                                  | 254 |
| 36 | Befreiung vom Sexualkundeunterricht. BVerwG, Beschluss vom 8.5.2008 (6 B 64/07) .....                                                                                    | 260 |
| 37 | Auflösung einer kath. Grundschule. VG Gelsenkirchen, Beschluss vom 9.5.2008 (4 L 1143/07) .....                                                                          | 268 |
| 38 | Weiterbeschäftigung als Rabbiner im Wege einstweiliger Verfügung. LAG Berlin-Brandenburg, Urteil vom 9.5.2008 (13 SaGa 739/08) ...                                       | 277 |
| 39 | Begründung der kirchl. Mitgliedschaft durch Taufe. FG Hamburg, Urteil vom 13.5.2008 (3 K 35/08) .....                                                                    | 280 |
| 40 | Rechtshängigkeit eines Ehescheidungsverfahrens vor israelischem Rabbinatsgericht. BGH, Urteil vom 28.5.2008 (XII ZR 61/0) .....                                          | 283 |
| 41 | Gebühren eines kirchengerichtlichen Verfahrens. VG Hannover, Urteil vom 30.5.2008 (2 A 813/07) .....                                                                     | 293 |
| 42 | Kritik an Diözese in einem Leserbrief. OLG Nürnberg, Beschluss vom 5.6.2008 (3 W 791/08) .....                                                                           | 306 |
| 43 | Rechtsnatur der Kirchensteuer u. Revisibilität kirchl. Rechts. BFH, Beschluss vom 10.6.2008 (I B 211/07) .....                                                           | 309 |
| 44 | Rückwirkende Einführung eines besonderen Kirchgeldes während des Veranlagungszeitraums. Niedersächsisches OVG, Urteil vom 11.6.2008 (13 LC 583/04) .....                 | 312 |
| 45 | Differenzierung zwischen religiösen und weltanschaulichen Zwecken eines Vereins. Hessisches Finanzgericht, Urteil vom 16.6.2008 (4 K 3773/05) .....                      | 322 |
| 46 | Aberkennung des Status einer Körperschaft des öffentlichen Rechts gegenüber einer Religionsgemeinschaft. VGH Baden-Württemberg, Urteil vom 20.6.2008 (1 S 1940/07) ..... | 326 |
| 47 | Zeitläuten vom Glockenturm einer Kirche im allgemeinen Wohngebiet. LG Arnberg, Urteil vom 24.6.2008 (5 S 43/07) .....                                                    | 338 |

|    |                                                                                                                   |     |
|----|-------------------------------------------------------------------------------------------------------------------|-----|
| 48 | Eingeschränktes Kopftuchverbot für Lehramtsreferendarin. BVerwG, Urteil vom 26.6.2008 (2 C 22/079) .....          | 345 |
| 49 | Änderungskündigung mit Umzugsverpflichtung für Küster/Hausmeister. BAG, Urteil vom 26.6.2008 (2 AZR 147/07) ..... | 352 |
